# Supplementary material for: Isotope analysis of iron on structural materials of nuclear power plants using double-pulse laser ablation molecular isotopic spectrometry
Source: Royal Society of Chemistry journal article supplement (doi:10.1039/d1ja00097g), 2021-01-01
Supplement: d1ja00097g1.pdf [file d1ja00097g1.pdf]

## Supplementary Material: Isotope analysis of iron on structural materials of nuclear power plant using double-pulse laser ablation molecular isotopic spectrometry

Sung-Uk Choi<sup>1</sup>, Sol-Chan Han<sup>1</sup>, Jun-Yeop Lee<sup>2</sup>, and Jong-Il Yun<sup>1\*</sup>

<sup>1</sup>Department of Nuclear and Quantum Engineering, KAIST, 291 Daehak-ro, Yuseong-gu, Daejeon 34141, Republic of Korea

<sup>2</sup>School of Mechanical Engineering, Pusan National University, 2, Busandaehak-ro 63beon-gil, Geumjeong-gu, Busan 46241, Republic of Korea

### S-1. Chemical composition of structural materials

**Table S-1.** Chemical Composition of Utilized Specimens

| Stainless steel 304 (wt%) |      | Inconel 690 (wt%) |      | Portland cement (wt%)          |      |
|---------------------------|------|-------------------|------|--------------------------------|------|
| Fe                        | 70.9 | Ni                | 60.4 | CaO                            | 64.6 |
| Cr                        | 18.2 | Cr                | 31.0 | SiO <sub>2</sub>               | 21.3 |
| Ni                        | 8.5  | Fe                | 7.0  | Al <sub>2</sub> O <sub>3</sub> | 5.6  |
| Mn                        | 1.8  | Cu                | 0.5  | Fe <sub>2</sub> O <sub>3</sub> | 3.4  |
| Si                        | 0.6  | Mn                | 0.5  | MgO                            | 2.1  |
| N                         | 0.05 | Cu                | 0.5  | SO <sub>3</sub>                | 2.1  |
| C                         | 0.05 | C                 | 0.05 | N <sub>2</sub> O               | 0.05 |
| S                         | 0.01 | Si                | 0.02 |                                |      |
| P                         | 0.03 |                   |      |                                |      |

### S-2. Optimized measurement condition according to matrix

The optimized measurement conditions (see Table S-2) were determined by considering the result of Figure S-1.

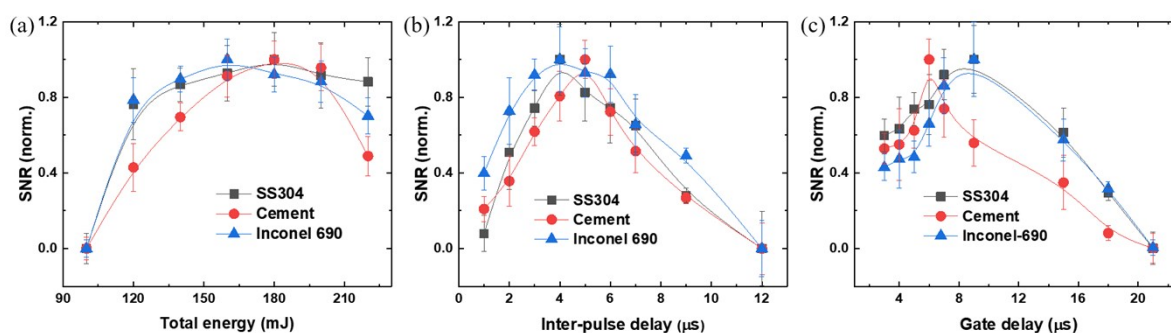

**Figure S-1.** Signal to noise ratio (SNR) of iron oxide emission as a function of (a) total energy, (b) inter-pulse delay, and (c) gate delay according to the matrix

**Table S-2.** Optimized Measurement Conditions for Surface Detection of Each matrix

|         | Total energy (mJ) | Inter-pulse delay (μs) | Gate delay (μs) | Gate width (μs) |
|---------|-------------------|------------------------|-----------------|-----------------|
| SS304   | 180               | 4                      | 4               | 100             |
| Inconel | 165               | 4                      | 4               | 100             |
| Cement  | 180               | 5                      | 4               | 100             |

### S-3. Methods of plasma characterization

Under the local thermal equilibrium (LTE) condition, plasma temperature ( $T$ ) could be determined by Boltzmann plot method with below equation (1)<sup>S-1</sup>.

$$\ln \left( \frac{I_{mn} \lambda_{mn}}{A_{ki} g_m} \right) = - \frac{E_m}{k_B T} + \ln \left( \frac{h c n_0(T)}{4 \pi Z(T)} \right) \quad (1)$$

$I_{mn}$ : Line intensity of transition from upper level  $m$  to lower level  $n$

$\lambda_{mn}$ : Wavelength of the transition

$A_{mn}$ : Spontaneous emission probability

$g_m$ : Statistic weight of the upper level  $m$

$E_m$ : Energy of the upper level  $m$

$k_B$ : Boltzmann constant

$h$ : Planck constants

$n_0(T)$ : Number density

$Z(T)$ : Partition function

**Table S-3.** Utilized Spectral Parameters of Iron Atomic Emission<sup>S-1</sup>

| $\lambda_{mn}$ (nm) | $E_m$ (cm <sup>-1</sup> ) | $g_m$ | $A_{mn}$ (x10 <sup>8</sup> s <sup>-1</sup> ) |
|---------------------|---------------------------|-------|----------------------------------------------|
| 371.9               | 26875                     | 11    | 0.163                                        |
| 373.5               | 33695                     | 11    | 0.902                                        |
| 374.6               | 27395                     | 7     | 0.115                                        |
| 375.8               | 34329                     | 7     | 0.634                                        |
| 376.4               | 34547                     | 5     | 0.540                                        |

Plasma electron density could be obtained using Stark broadening effect of Fe I (541.4 nm) with the below equation (2)<sup>S-2</sup>.

$$\Delta \lambda_S^{Fe} = 0.3612 \frac{N_e}{10^{23}} \left( \frac{T}{13000} \right)^{1.6551} \quad (2)$$

$\Delta \lambda_S^{Fe}$ : Linewidth of iron atomic line (541.4 nm)

$N_e$ : electron density [m<sup>-3</sup>]

### References

**(S-1)** Rifai, K.; Laville, S.; Vidal, F.; Sabsabi, M.; Chaker, M. Quantitative analysis of metallic traces in water-based liquids by UV-IR double-pulse laser-induced breakdown spectroscopy. *J. Anal. At. Spectrom.* **2012**, 27(2), 276-283.

**(S-2)** Zielinska, S.; Pellerin, S.; Dzierzega, K.; Valensi, F.; Musiol, K.; Briand, F. Measurement of atomic Stark parameters of many Mn I and Fe I spectral lines using GMAW process. *J. Phys. D: Appl. Phys.* **2010**, 43(43), 434005.
